# Supplementary material for: Child uptake of smoking by area across the UK
Source: HighWire-hosted journal article supplement (doi:10.1136/thoraxjnl-2013-204379), 2013-12-04
Supplement: thoraxjnl-2013-204379supp.pdf [file thoraxjnl-2013-204379supp.pdf]

## Child uptake of smoking by area across the United Kingdom

<sup>1</sup>Nicholas S Hopkinson, <sup>2</sup>Adam Lester-George, <sup>3</sup>Nick Ormiston-Smith, <sup>3</sup>Alison Cox,  
<sup>2</sup>Deborah Arnott

<sup>1</sup>The NIHR Biomedical Research Unit of Royal Brompton and Harefield NHS  
Foundation Trust and Imperial College, London

Royal Brompton Hospital

Fulham Rd

London SW3 6NP

[n.hopkinson@ic.ac.uk](mailto:n.hopkinson@ic.ac.uk)

Tel: 020 73497775

Fax: 020 73497778

<sup>2</sup>Action on Smoking and Health

<sup>3</sup>Cancer Research UK, London UK

The relevant data sources for the study are listed below:

1 - Cancer Research UK. New childhood smokers as estimated from the Smoking, Drinking and Drug Use Among Young People in England survey (2013)

<http://www.cancerresearchuk.org/cancer-info/cancerstats/types/lung/smoking/lung-cancer-and-smoking-statistics>

### **Population**

2 - Office for National Statistics. Mid-year Population Estimates: Single year of age and sex for local authorities in England and Wales (2010 & 2011)

<http://www.ons.gov.uk/ons/rel/pop-estimate/population-estimates-for-england-and-wales/mid-2011--2011-census-based-/stb---mid-2011-census-based-population-estimates-for-england-and-wales.html>

3 - General Register Office for Scotland. Estimated mid-year population by sex, single year of age and administrative area (2010 & 2011)

<http://www.gro-scotland.gov.uk/statistics/theme/population/estimates/mid-year/2011/tables.html>

4 - Northern Ireland Statistics and Research Agency. Mid-year population estimates for Local Government Districts (2010 & 2011)

<http://www.nisra.gov.uk/demography/default.asp17.htm>

### **Smoking rates**

6 - Statistics for Wales. Welsh Health Survey - smoking (2011)

<http://wales.gov.uk/topics/statistics/headlines/health2012/120919/?lang=en>

7 - The Scottish Government. The Scottish Health Survey - Smoking (2011)

<http://www.scotland.gov.uk/Topics/Statistics/Browse/Health/TrendSmoking>

8 - Northern Ireland Department of Health, Social Services and Public Safety. Health Survey Northern Ireland (2011/12)

[http://www.dhsspsni.gov.uk/index/stats\\_research/stats-public-health.htm](http://www.dhsspsni.gov.uk/index/stats_research/stats-public-health.htm)

Table E1 Smoking uptake among children 11-15 years old by country and region

| Region                   | Adult population | Smoking prevalence | Number of adult smokers | % of UK smokers | Number of new childhood smokers per: |          |        |       |     |      |
|--------------------------|------------------|--------------------|-------------------------|-----------------|--------------------------------------|----------|--------|-------|-----|------|
|                          |                  |                    |                         |                 | Year                                 | 6 months | Month  | Week  | Day | Hour |
| United Kingdom           | 49,790,339       | 20.52%             | 10,214,507              | 100.00%         | 207,000                              | 103,500  | 17,250 | 3,981 | 567 | 24   |
| England                  | 41,766,418       | 19.96%             | 8,338,497               | 81.63%          | 168,982                              | 84,491   | 14,082 | 3,250 | 463 | 19   |
| Scotland                 | 4,218,391        | 23.30%             | 982,885                 | 9.62%           | 19,918                               | 9,959    | 1,660  | 383   | 55  | 2    |
| Wales                    | 2,431,325        | 22.60%             | 549,573                 | 5.38%           | 11,137                               | 5,569    | 928    | 214   | 30  | 1    |
| Northern Ireland         | 1,374,205        | 25.00%             | 343,551                 | 3.36%           | 6,962                                | 3,481    | 580    | 134   | 19  | 1    |
| East Midlands            | 3,584,293        | 19.82%             | 710,548                 | 6.96%           | 14,399                               | 7,200    | 1,200  | 277   | 39  | 2    |
| East England             | 4,604,976        | 19.55%             | 900,395                 | 8.81%           | 18,247                               | 9,123    | 1,521  | 351   | 50  | 2    |
| London                   | 6,388,233        | 18.95%             | 1,210,335               | 11.85%          | 24,528                               | 12,264   | 2,044  | 472   | 67  | 3    |
| North East               | 2,070,981        | 21.23%             | 439,739                 | 4.31%           | 8,911                                | 4,456    | 743    | 171   | 24  | 1    |
| North West               | 5,555,330        | 22.07%             | 1,226,020               | 12.00%          | 24,846                               | 12,423   | 2,070  | 478   | 68  | 3    |
| South East               | 6,791,986        | 18.56%             | 1,260,602               | 12.34%          | 25,546                               | 12,773   | 2,129  | 491   | 70  | 3    |
| South West               | 4,242,125        | 19.19%             | 814,108                 | 7.97%           | 16,498                               | 8,249    | 1,375  | 317   | 45  | 2    |
| West Midlands            | 4,368,703        | 19.50%             | 851,776                 | 8.34%           | 17,261                               | 8,631    | 1,438  | 332   | 47  | 2    |
| Yorkshire and The Humber | 4,159,791        | 22.16%             | 921,919                 | 9.03%           | 18,683                               | 9,341    | 1,557  | 359   | 51  | 2    |
