# Supplementary material for: Child uptake of smoking by area across the UK
Source: HighWire-hosted journal article supplement (doi:10.1136/thoraxjnl-2013-204379), 2013-12-04
Supplement: thoraxjnl-2013-204379supp_table2.pdf [file thoraxjnl-2013-204379supp_table2.pdf]

| Authority        | District                  | Region        | Adult population | Smoking prevalence | Number of adult smokers | % of UK smokers | Number of new childhood smokers per: |          |       |      |     |
|------------------|---------------------------|---------------|------------------|--------------------|-------------------------|-----------------|--------------------------------------|----------|-------|------|-----|
|                  |                           |               |                  |                    |                         |                 | Year                                 | 6 months | Month | Week | Day |
| Derby            |                           | East Midlands | 191,949          | 19.45%             | 37,338                  | 0.37%           | 757                                  | 378      | 63    | 15   | 2   |
| Leicester        |                           | East Midlands | 251,787          | 21.38%             | 53,825                  | 0.53%           | 1,091                                | 545      | 91    | 21   | 3   |
| Rutland          |                           | East Midlands | 29,550           | 15.73%             | 4,647                   | 0.05%           | 94                                   | 47       | 8     | 2    | 0.3 |
| Nottingham       |                           | East Midlands | 241,442          | 23.34%             | 56,342                  | 0.55%           | 1,142                                | 571      | 95    | 22   | 3   |
| Derbyshire       |                           | East Midlands | 614,185          | 18.58%             | 114,087                 | 1.12%           | 2,312                                | 1,156    | 193   | 44   | 6   |
|                  | Amber Valley              | East Midlands | 97,921           | 19.85%             | 19,436                  | 0.19%           | 394                                  | 197      | 33    | 8    | 1   |
|                  | Bolsover                  | East Midlands | 60,363           | 25.20%             | 15,212                  | 0.15%           | 308                                  | 154      | 26    | 6    | 0.8 |
|                  | Chesterfield              | East Midlands | 82,909           | 18.25%             | 15,132                  | 0.15%           | 307                                  | 153      | 26    | 6    | 0.8 |
|                  | Derbyshire Dales          | East Midlands | 57,591           | 17.31%             | 9,971                   | 0.10%           | 202                                  | 101      | 17    | 4    | 0.6 |
|                  | Erewash                   | East Midlands | 89,183           | 18.19%             | 16,225                  | 0.16%           | 329                                  | 164      | 27    | 6    | 0.9 |
|                  | High Peak                 | East Midlands | 72,149           | 16.71%             | 12,059                  | 0.12%           | 244                                  | 122      | 20    | 5    | 0.7 |
|                  | North East Derbyshire     | East Midlands | 80,329           | 19.07%             | 15,319                  | 0.15%           | 310                                  | 155      | 26    | 6    | 0.8 |
|                  | South Derbyshire          | East Midlands | 73,740           | 14.76%             | 10,888                  | 0.11%           | 221                                  | 110      | 18    | 4    | 0.6 |
| Leicestershire   |                           | East Midlands | 517,281          | 17.07%             | 88,290                  | 0.86%           | 1,789                                | 895      | 149   | 34   | 5   |
|                  | Blaby                     | East Midlands | 74,079           | 15.30%             | 11,335                  | 0.11%           | 230                                  | 115      | 19    | 4    | 0.6 |
|                  | Charnwood                 | East Midlands | 133,493          | 18.71%             | 24,976                  | 0.24%           | 506                                  | 253      | 42    | 10   | 1   |
|                  | Harborough                | East Midlands | 67,039           | 15.04%             | 10,080                  | 0.10%           | 204                                  | 102      | 17    | 4    | 0.6 |
|                  | Hinckley and Bosworth     | East Midlands | 84,207           | 16.80%             | 14,150                  | 0.14%           | 287                                  | 143      | 24    | 6    | 0.8 |
|                  | Melton                    | East Midlands | 40,083           | 15.08%             | 6,045                   | 0.06%           | 123                                  | 61       | 10    | 2    | 0.3 |
|                  | North West Leicestershire | East Midlands | 73,716           | 19.48%             | 14,358                  | 0.14%           | 291                                  | 145      | 24    | 6    | 0.8 |
|                  | Oadby and Wigston         | East Midlands | 44,664           | 16.38%             | 7,315                   | 0.07%           | 148                                  | 74       | 12    | 3    | 0.4 |
| Northamptonshire |                           | East Midlands | 537,940          | 20.85%             | 112,177                 | 1.10%           | 2,273                                | 1,137    | 189   | 44   | 6   |
|                  | Corby                     | East Midlands | 47,259           | 25.49%             | 12,044                  | 0.12%           | 244                                  | 122      | 20    | 5    | 0.7 |
|                  | Daventry                  | East Midlands | 61,149           | 16.02%             | 9,799                   | 0.10%           | 199                                  | 99       | 17    | 4    | 0.5 |
|                  | East Northamptonshire     | East Midlands | 67,220           | 19.58%             | 13,163                  | 0.13%           | 267                                  | 133      | 22    | 5    | 0.7 |
|                  | Kettering                 | East Midlands | 72,763           | 23.45%             | 17,060                  | 0.17%           | 346                                  | 173      | 29    | 7    | 0.9 |
|                  | Northampton               | East Midlands | 164,192          | 23.33%             | 38,298                  | 0.37%           | 776                                  | 388      | 65    | 15   | 2   |
|                  | South Northamptonshire    | East Midlands | 66,711           | 11.18%             | 7,458                   | 0.07%           | 151                                  | 76       | 13    | 3    | 0.4 |
|                  | Wellingborough            | East Midlands | 58,646           | 25.30%             | 14,835                  | 0.15%           | 301                                  | 150      | 25    | 6    | 0.8 |
| Nottinghamshire  |                           | East Midlands | 624,692          | 19.74%             | 123,285                 | 1.21%           | 2,498                                | 1,249    | 208   | 48   | 7   |
|                  | Ashfield                  | East Midlands | 93,855           | 29.43%             | 27,621                  | 0.27%           | 560                                  | 280      | 47    | 11   | 2   |
|                  | Bassetlaw                 | East Midlands | 89,765           | 13.81%             | 12,397                  | 0.12%           | 251                                  | 126      | 21    | 5    | 0.7 |
|                  | Broxtowe                  | East Midlands | 88,473           | 16.40%             | 14,513                  | 0.14%           | 294                                  | 147      | 25    | 6    | 0.8 |
|                  | Gedling                   | East Midlands | 90,564           | 15.55%             | 14,082                  | 0.14%           | 285                                  | 143      | 24    | 5    | 0.8 |
|                  | Mansfield                 | East Midlands | 82,827           | 29.25%             | 24,227                  | 0.24%           | 491                                  | 245      | 41    | 9    | 1   |

| Authority            | District             | Region          | Adult population | Smoking prevalence | Number of adult smokers | % of UK smokers | Number of new childhood smokers per: |          |       |      |     |
|----------------------|----------------------|-----------------|------------------|--------------------|-------------------------|-----------------|--------------------------------------|----------|-------|------|-----|
|                      |                      |                 |                  |                    |                         |                 | Year                                 | 6 months | Month | Week | Day |
|                      | Newark and Sherwood  | East Midlands   | 91,239           | 20.08%             | 18,323                  | 0.18%           | 371                                  | 186      | 31    | 7    | 1   |
|                      | Rushcliffe           | East Midlands   | 87,969           | 14.80%             | 13,022                  | 0.13%           | 264                                  | 132      | 22    | 5    | 0.7 |
| Peterborough         |                      | East of England | 140,416          | 23.70%             | 33,279                  | 0.33%           | 674                                  | 337      | 56    | 13   | 2   |
| Luton                |                      | East of England | 151,385          | 20.55%             | 31,103                  | 0.30%           | 630                                  | 315      | 53    | 12   | 2   |
| Bedford              |                      | East of England | 122,024          | 16.32%             | 19,920                  | 0.20%           | 404                                  | 202      | 34    | 8    | 1   |
| Central Bedfordshire |                      | East of England | 199,250          | 16.08%             | 32,034                  | 0.31%           | 649                                  | 325      | 54    | 12   | 2   |
| Southend-on-Sea      |                      | East of England | 136,829          | 22.36%             | 30,591                  | 0.30%           | 620                                  | 310      | 52    | 12   | 2   |
| Thurrock             |                      | East of England | 119,777          | 20.64%             | 24,717                  | 0.24%           | 501                                  | 250      | 42    | 10   | 1   |
| Cambridgeshire       |                      | East of England | 494,568          | 19.50%             | 96,460                  | 0.94%           | 1,955                                | 977      | 163   | 38   | 5   |
|                      | Cambridge            | East of England | 102,566          | 15.24%             | 15,636                  | 0.15%           | 317                                  | 158      | 26    | 6    | 0.9 |
|                      | East Cambridgeshire  | East of England | 65,814           | 13.25%             | 8,720                   | 0.09%           | 177                                  | 88       | 15    | 3    | 0.5 |
|                      | Fenland              | East of England | 76,321           | 25.53%             | 19,488                  | 0.19%           | 395                                  | 197      | 33    | 8    | 1   |
|                      | Huntingdonshire      | East of England | 133,390          | 22.13%             | 29,517                  | 0.29%           | 598                                  | 299      | 50    | 12   | 2   |
|                      | South Cambridgeshire | East of England | 116,477          | 19.94%             | 23,220                  | 0.23%           | 471                                  | 235      | 39    | 9    | 1   |
| Essex                |                      | East of England | 1,101,007        | 18.70%             | 205,855                 | 2.02%           | 4,172                                | 2,086    | 348   | 80   | 11  |
|                      | Basildon             | East of England | 135,004          | 15.71%             | 21,205                  | 0.21%           | 430                                  | 215      | 36    | 8    | 1   |
|                      | Braintree            | East of England | 114,888          | 19.66%             | 22,586                  | 0.22%           | 458                                  | 229      | 38    | 9    | 1   |
|                      | Brentwood            | East of England | 58,296           | 14.40%             | 8,397                   | 0.08%           | 170                                  | 85       | 14    | 3    | 0.5 |
|                      | Castle Point         | East of England | 70,882           | 18.93%             | 13,418                  | 0.13%           | 272                                  | 136      | 23    | 5    | 0.7 |
|                      | Chelmsford           | East of England | 132,850          | 18.96%             | 25,192                  | 0.25%           | 511                                  | 255      | 43    | 10   | 1   |
|                      | Colchester           | East of England | 137,696          | 22.48%             | 30,960                  | 0.30%           | 627                                  | 314      | 52    | 12   | 2   |
|                      | Epping Forest        | East of England | 98,861           | 16.55%             | 16,363                  | 0.16%           | 332                                  | 166      | 28    | 6    | 0.9 |
|                      | Harlow               | East of England | 63,046           | 23.01%             | 14,505                  | 0.14%           | 294                                  | 147      | 24    | 6    | 0.8 |
|                      | Maldon               | East of England | 49,415           | 18.78%             | 9,282                   | 0.09%           | 188                                  | 94       | 16    | 4    | 0.5 |
|                      | Rochford             | East of England | 66,147           | 15.43%             | 10,205                  | 0.10%           | 207                                  | 103      | 17    | 4    | 0.6 |
|                      | Tendring             | East of England | 112,239          | 22.03%             | 24,726                  | 0.24%           | 501                                  | 251      | 42    | 10   | 1   |
|                      | Uttlesford           | East of England | 61,683           | 13.92%             | 8,587                   | 0.08%           | 174                                  | 87       | 15    | 3    | 0.5 |
| Hertfordshire        |                      | East of England | 866,461          | 19.45%             | 168,526                 | 1.65%           | 3,415                                | 1,708    | 285   | 66   | 9   |
|                      | Broxbourne           | East of England | 72,501           | 21.47%             | 15,563                  | 0.15%           | 315                                  | 158      | 26    | 6    | 0.9 |
|                      | Dacorum              | East of England | 112,595          | 18.73%             | 21,091                  | 0.21%           | 427                                  | 214      | 36    | 8    | 1   |
|                      | East Hertfordshire   | East of England | 106,640          | 13.86%             | 14,783                  | 0.14%           | 300                                  | 150      | 25    | 6    | 0.8 |
|                      | Hertsmere            | East of England | 77,399           | 19.37%             | 14,993                  | 0.15%           | 304                                  | 152      | 25    | 6    | 0.8 |
|                      | North Hertfordshire  | East of England | 99,535           | 16.72%             | 16,639                  | 0.16%           | 337                                  | 169      | 28    | 6    | 0.9 |
|                      | St Albans            | East of England | 107,392          | 18.97%             | 20,367                  | 0.20%           | 413                                  | 206      | 34    | 8    | 1   |
|                      | Stevenage            | East of England | 64,778           | 27.62%             | 17,894                  | 0.18%           | 363                                  | 181      | 30    | 7    | 1   |

| Authority            | District                     | Region          | Adult population | Smoking prevalence | Number of adult smokers | % of UK smokers | Number of new childhood smokers per: |          |       |      |     |
|----------------------|------------------------------|-----------------|------------------|--------------------|-------------------------|-----------------|--------------------------------------|----------|-------|------|-----|
|                      |                              |                 |                  |                    |                         |                 | Year                                 | 6 months | Month | Week | Day |
|                      | Three Rivers                 | East of England | 68,035           | 22.31%             | 15,178                  | 0.15%           | 308                                  | 154      | 26    | 6    | 0.8 |
|                      | Watford                      | East of England | 69,770           | 16.61%             | 11,591                  | 0.11%           | 235                                  | 117      | 20    | 5    | 0.6 |
|                      | Welwyn Hatfield              | East of England | 87,816           | 23.56%             | 20,692                  | 0.20%           | 419                                  | 210      | 35    | 8    | 1   |
| Lincolnshire         |                              | East of England | 575,467          | 20.98%             | 120,741                 | 1.18%           | 2,447                                | 1,223    | 204   | 47   | 7   |
|                      | Boston                       | East of England | 51,764           | 26.15%             | 13,534                  | 0.13%           | 274                                  | 137      | 23    | 5    | 0.8 |
|                      | East Lindsey                 | East of England | 112,492          | 23.62%             | 26,568                  | 0.26%           | 538                                  | 269      | 45    | 10   | 1   |
|                      | Lincoln                      | East of England | 75,696           | 28.33%             | 21,444                  | 0.21%           | 435                                  | 217      | 36    | 8    | 1   |
|                      | North Kesteven               | East of England | 86,664           | 19.98%             | 17,312                  | 0.17%           | 351                                  | 175      | 29    | 7    | 1   |
|                      | South Holland                | East of England | 71,443           | 14.69%             | 10,497                  | 0.10%           | 213                                  | 106      | 18    | 4    | 0.6 |
|                      | South Kesteven               | East of England | 105,905          | 17.27%             | 18,287                  | 0.18%           | 371                                  | 185      | 31    | 7    | 1   |
|                      | West Lindsey                 | East of England | 71,503           | 17.88%             | 12,783                  | 0.13%           | 259                                  | 130      | 22    | 5    | 0.7 |
| Norfolk              |                              | East of England | 694,344          | 20.33%             | 141,173                 | 1.38%           | 2,861                                | 1,430    | 238   | 55   | 8   |
|                      | Breckland                    | East of England | 104,820          | 19.97%             | 20,930                  | 0.20%           | 424                                  | 212      | 35    | 8    | 1   |
|                      | Broadland                    | East of England | 100,784          | 18.22%             | 18,358                  | 0.18%           | 372                                  | 186      | 31    | 7    | 1   |
|                      | Great Yarmouth               | East of England | 77,455           | 24.93%             | 19,311                  | 0.19%           | 391                                  | 196      | 33    | 8    | 1   |
|                      | King's Lynn and West Norfolk | East of England | 119,665          | 19.35%             | 23,153                  | 0.23%           | 469                                  | 235      | 39    | 9    | 1   |
|                      | North Norfolk                | East of England | 84,739           | 14.57%             | 12,342                  | 0.12%           | 250                                  | 125      | 21    | 5    | 0.7 |
|                      | Norwich                      | East of England | 107,951          | 26.35%             | 28,445                  | 0.28%           | 576                                  | 288      | 48    | 11   | 2   |
|                      | South Norfolk                | East of England | 98,930           | 18.43%             | 18,234                  | 0.18%           | 370                                  | 185      | 31    | 7    | 1   |
| Suffolk              |                              | East of England | 578,915          | 20.35%             | 117,819                 | 1.15%           | 2,388                                | 1,194    | 199   | 46   | 7   |
|                      | Babergh                      | East of England | 69,695           | 14.69%             | 10,239                  | 0.10%           | 208                                  | 104      | 17    | 4    | 0.6 |
|                      | Forest Heath                 | East of England | 47,615           | 24.12%             | 11,484                  | 0.11%           | 233                                  | 116      | 19    | 4    | 0.6 |
|                      | Ipswich                      | East of England | 104,207          | 21.05%             | 21,940                  | 0.21%           | 445                                  | 222      | 37    | 9    | 1   |
|                      | Mid Suffolk                  | East of England | 76,879           | 19.53%             | 15,017                  | 0.15%           | 304                                  | 152      | 25    | 6    | 0.8 |
|                      | St Edmundsbury               | East of England | 88,327           | 24.12%             | 21,302                  | 0.21%           | 432                                  | 216      | 36    | 8    | 1   |
|                      | Suffolk Coastal              | East of England | 99,497           | 16.69%             | 16,606                  | 0.16%           | 337                                  | 168      | 28    | 6    | 0.9 |
|                      | Waveney                      | East of England | 92,695           | 22.94%             | 21,266                  | 0.21%           | 431                                  | 215      | 36    | 8    | 1   |
| City of London       |                              | London          | 6,728            | 41.67%             | 2,804                   | 0.03%           | 57                                   | 28       | 5     | 1    | 0.2 |
| Barking and Dagenham |                              | London          | 133,215          | 22.97%             | 30,598                  | 0.30%           | 620                                  | 310      | 52    | 12   | 2   |
| Barnet               |                              | London          | 274,324          | 17.49%             | 47,974                  | 0.47%           | 972                                  | 486      | 81    | 19   | 3   |
| Bexley               |                              | London          | 178,573          | 19.27%             | 34,411                  | 0.34%           | 697                                  | 349      | 58    | 13   | 2   |
| Brent                |                              | London          | 241,792          | 18.18%             | 43,965                  | 0.43%           | 891                                  | 445      | 74    | 17   | 2   |
| Bromley              |                              | London          | 241,896          | 18.12%             | 43,822                  | 0.43%           | 888                                  | 444      | 74    | 17   | 2   |
| Camden               |                              | London          | 181,084          | 17.30%             | 31,336                  | 0.31%           | 635                                  | 318      | 53    | 12   | 2   |
| Croydon              |                              | London          | 275,599          | 19.67%             | 54,219                  | 0.53%           | 1,099                                | 549      | 92    | 21   | 3   |

| Authority              | District | Region             | Adult population | Smoking prevalence | Number of adult smokers | % of UK smokers | Number of new childhood smokers per: |          |       |      |     |
|------------------------|----------|--------------------|------------------|--------------------|-------------------------|-----------------|--------------------------------------|----------|-------|------|-----|
|                        |          |                    |                  |                    |                         |                 | Year                                 | 6 months | Month | Week | Day |
| Ealing                 |          | London             | 262,527          | 20.12%             | 52,809                  | 0.52%           | 1,070                                | 535      | 89    | 21   | 3   |
| Enfield                |          | London             | 235,049          | 18.47%             | 43,420                  | 0.43%           | 880                                  | 440      | 73    | 17   | 2   |
| Greenwich              |          | London             | 194,025          | 17.93%             | 34,780                  | 0.34%           | 705                                  | 352      | 59    | 14   | 2   |
| Hackney                |          | London             | 190,714          | 25.24%             | 48,142                  | 0.47%           | 976                                  | 488      | 81    | 19   | 3   |
| Hammersmith and Fulham |          | London             | 149,882          | 20.67%             | 30,978                  | 0.30%           | 628                                  | 314      | 52    | 12   | 2   |
| Haringey               |          | London             | 197,974          | 18.76%             | 37,142                  | 0.36%           | 753                                  | 376      | 63    | 14   | 2   |
| Harrow                 |          | London             | 185,737          | 14.64%             | 27,184                  | 0.27%           | 551                                  | 275      | 46    | 11   | 2   |
| Havering               |          | London             | 186,957          | 20.04%             | 37,458                  | 0.37%           | 759                                  | 380      | 63    | 15   | 2   |
| Hillingdon             |          | London             | 211,056          | 17.64%             | 37,229                  | 0.36%           | 754                                  | 377      | 63    | 15   | 2   |
| Hounslow               |          | London             | 197,298          | 15.29%             | 30,171                  | 0.30%           | 611                                  | 306      | 51    | 12   | 2   |
| Islington              |          | London             | 169,966          | 21.84%             | 37,113                  | 0.36%           | 752                                  | 376      | 63    | 14   | 2   |
| Kensington and Chelsea |          | London             | 131,522          | 18.05%             | 23,742                  | 0.23%           | 481                                  | 241      | 40    | 9    | 1   |
| Kingston upon Thames   |          | London             | 126,574          | 18.30%             | 23,169                  | 0.23%           | 470                                  | 235      | 39    | 9    | 1   |
| Lambeth                |          | London             | 244,054          | 20.15%             | 49,167                  | 0.48%           | 996                                  | 498      | 83    | 19   | 3   |
| Lewisham               |          | London             | 213,291          | 22.07%             | 47,082                  | 0.46%           | 954                                  | 477      | 80    | 18   | 3   |
| Merton                 |          | London             | 157,101          | 16.48%             | 25,885                  | 0.25%           | 525                                  | 262      | 44    | 10   | 1   |
| Newham                 |          | London             | 232,345          | 18.79%             | 43,659                  | 0.43%           | 885                                  | 442      | 74    | 17   | 2   |
| Redbridge              |          | London             | 210,443          | 16.11%             | 33,911                  | 0.33%           | 687                                  | 344      | 57    | 13   | 2   |
| Richmond upon Thames   |          | London             | 146,801          | 19.74%             | 28,986                  | 0.28%           | 587                                  | 294      | 49    | 11   | 2   |
| Southwark              |          | London             | 229,678          | 17.51%             | 40,214                  | 0.39%           | 815                                  | 407      | 68    | 16   | 2   |
| Sutton                 |          | London             | 147,902          | 17.69%             | 26,159                  | 0.26%           | 530                                  | 265      | 44    | 10   | 1   |
| Tower Hamlets          |          | London             | 200,617          | 21.49%             | 43,106                  | 0.42%           | 874                                  | 437      | 73    | 17   | 2   |
| Waltham Forest         |          | London             | 198,122          | 19.37%             | 38,385                  | 0.38%           | 778                                  | 389      | 65    | 15   | 2   |
| Wandsworth             |          | London             | 251,877          | 16.16%             | 40,705                  | 0.40%           | 825                                  | 412      | 69    | 16   | 2   |
| Westminster            |          | London             | 183,510          | 21.55%             | 39,539                  | 0.39%           | 801                                  | 401      | 67    | 15   | 2   |
| Gateshead              |          | North East England | 160,091          | 21.32%             | 34,128                  | 0.33%           | 692                                  | 346      | 58    | 13   | 2   |
| Newcastle upon Tyne    |          | North East England | 225,100          | 23.58%             | 53,088                  | 0.52%           | 1,076                                | 538      | 90    | 21   | 3   |
| North Tyneside         |          | North East England | 160,879          | 22.57%             | 36,303                  | 0.36%           | 736                                  | 368      | 61    | 14   | 2   |
| South Tyneside         |          | North East England | 118,569          | 21.61%             | 25,628                  | 0.25%           | 519                                  | 260      | 43    | 10   | 1   |
| Sunderland             |          | North East England | 220,528          | 22.13%             | 48,800                  | 0.48%           | 989                                  | 494      | 82    | 19   | 3   |
| Hartlepool             |          | North East England | 71,728           | 23.53%             | 16,875                  | 0.17%           | 342                                  | 171      | 28    | 7    | 0.9 |
| Middlesbrough          |          | North East England | 106,613          | 24.71%             | 26,342                  | 0.26%           | 534                                  | 267      | 44    | 10   | 1   |
| Redcar and Cleveland   |          | North East England | 107,415          | 21.65%             | 23,258                  | 0.23%           | 471                                  | 236      | 39    | 9    | 1   |
| Stockton-on-Tees       |          | North East England | 149,545          | 17.80%             | 26,616                  | 0.26%           | 539                                  | 270      | 45    | 10   | 1   |
| Darlington             |          | North East England | 82,659           | 23.31%             | 19,264                  | 0.19%           | 390                                  | 195      | 33    | 8    | 1   |

| Authority                 | District          | Region             | Adult population | Smoking prevalence | Number of adult smokers | % of UK smokers | Number of new childhood smokers per: |          |       |      |     |
|---------------------------|-------------------|--------------------|------------------|--------------------|-------------------------|-----------------|--------------------------------------|----------|-------|------|-----|
|                           |                   |                    |                  |                    |                         |                 | Year                                 | 6 months | Month | Week | Day |
| County Durham             |                   | North East England | 412,875          | 20.87%             | 86,152                  | 0.84%           | 1,746                                | 873      | 145   | 34   | 5   |
| Northumberland            |                   | North East England | 254,979          | 16.77%             | 42,753                  | 0.42%           | 866                                  | 433      | 72    | 17   | 2   |
| Bolton                    |                   | North West England | 212,678          | 22.88%             | 48,658                  | 0.48%           | 986                                  | 493      | 82    | 19   | 3   |
| Bury                      |                   | North West England | 143,451          | 21.99%             | 31,546                  | 0.31%           | 639                                  | 320      | 53    | 12   | 2   |
| Manchester                |                   | North West England | 394,420          | 27.25%             | 107,475                 | 1.05%           | 2,178                                | 1,089    | 182   | 42   | 6   |
| Oldham                    |                   | North West England | 168,605          | 24.94%             | 42,057                  | 0.41%           | 852                                  | 426      | 71    | 16   | 2   |
| Rochdale                  |                   | North West England | 161,249          | 23.60%             | 38,062                  | 0.37%           | 771                                  | 386      | 64    | 15   | 2   |
| Salford                   |                   | North West England | 183,699          | 25.38%             | 46,618                  | 0.46%           | 945                                  | 472      | 79    | 18   | 3   |
| Stockport                 |                   | North West England | 222,699          | 21.46%             | 47,780                  | 0.47%           | 968                                  | 484      | 81    | 19   | 3   |
| Tameside                  |                   | North West England | 171,263          | 24.09%             | 41,264                  | 0.40%           | 836                                  | 418      | 70    | 16   | 2   |
| Trafford                  |                   | North West England | 175,275          | 19.49%             | 34,155                  | 0.33%           | 692                                  | 346      | 58    | 13   | 2   |
| Wigan                     |                   | North West England | 250,182          | 22.76%             | 56,951                  | 0.56%           | 1,154                                | 577      | 96    | 22   | 3   |
| Knowsley                  |                   | North West England | 113,222          | 27.58%             | 31,225                  | 0.31%           | 633                                  | 316      | 53    | 12   | 2   |
| Liverpool                 |                   | North West England | 376,849          | 24.20%             | 91,214                  | 0.89%           | 1,848                                | 924      | 154   | 36   | 5   |
| St Helens                 |                   | North West England | 139,036          | 20.66%             | 28,725                  | 0.28%           | 582                                  | 291      | 49    | 11   | 2   |
| Sefton                    |                   | North West England | 219,776          | 18.34%             | 40,318                  | 0.39%           | 817                                  | 409      | 68    | 16   | 2   |
| Wirral                    |                   | North West England | 252,259          | 21.82%             | 55,045                  | 0.54%           | 1,116                                | 558      | 93    | 21   | 3   |
| Cheshire East             |                   | North West England | 295,835          | 15.29%             | 45,243                  | 0.44%           | 917                                  | 458      | 76    | 18   | 3   |
| Halton                    |                   | North West England | 97,536           | 23.12%             | 22,548                  | 0.22%           | 457                                  | 228      | 38    | 9    | 1   |
| Warrington                |                   | North West England | 158,719          | 14.41%             | 22,868                  | 0.22%           | 463                                  | 232      | 39    | 9    | 1   |
| Cheshire West and Chester |                   | North West England | 263,640          | 19.47%             | 51,338                  | 0.50%           | 1,040                                | 520      | 87    | 20   | 3   |
| Blackburn with Darwen     |                   | North West England | 109,071          | 27.17%             | 29,631                  | 0.29%           | 600                                  | 300      | 50    | 12   | 2   |
| Blackpool                 |                   | North West England | 113,194          | 25.89%             | 29,310                  | 0.29%           | 594                                  | 297      | 49    | 11   | 2   |
| Cumbria                   |                   | North West England | 404,301          | 21.66%             | 87,588                  | 0.86%           | 1,775                                | 888      | 148   | 34   | 5   |
|                           | Allerdale         | North West England | 77,738           | 22.56%             | 17,537                  | 0.17%           | 355                                  | 178      | 30    | 7    | 1   |
|                           | Barrow-in-Furness | North West England | 54,893           | 24.42%             | 13,407                  | 0.13%           | 272                                  | 136      | 23    | 5    | 0.7 |
|                           | Carlisle          | North West England | 86,558           | 24.22%             | 20,964                  | 0.21%           | 425                                  | 212      | 35    | 8    | 1   |
|                           | Copeland          | North West England | 56,933           | 28.43%             | 16,188                  | 0.16%           | 328                                  | 164      | 27    | 6    | 0.9 |
|                           | Eden              | North West England | 42,803           | 13.70%             | 5,864                   | 0.06%           | 119                                  | 59       | 10    | 2    | 0.3 |
|                           | South Lakeland    | North West England | 85,376           | 15.72%             | 13,421                  | 0.13%           | 272                                  | 136      | 23    | 5    | 0.7 |
| Lancashire                |                   | North West England | 928,371          | 21.18%             | 196,658                 | 1.93%           | 3,985                                | 1,993    | 332   | 77   | 11  |
|                           | Burnley           | North West England | 67,660           | 23.04%             | 15,590                  | 0.15%           | 316                                  | 158      | 26    | 6    | 0.9 |
|                           | Chorley           | North West England | 85,417           | 17.75%             | 15,166                  | 0.15%           | 307                                  | 154      | 26    | 6    | 0.8 |
|                           | Fylde             | North West England | 62,290           | 12.47%             | 7,765                   | 0.08%           | 157                                  | 79       | 13    | 3    | 0.4 |
|                           | Hyndburn          | North West England | 61,804           | 21.29%             | 13,158                  | 0.13%           | 267                                  | 133      | 22    | 5    | 0.7 |

| Authority              | District              | Region             | Adult population | Smoking prevalence | Number of adult smokers | % of UK smokers | Number of new childhood smokers per: |          |       |      |     |
|------------------------|-----------------------|--------------------|------------------|--------------------|-------------------------|-----------------|--------------------------------------|----------|-------|------|-----|
|                        |                       |                    |                  |                    |                         |                 | Year                                 | 6 months | Month | Week | Day |
|                        | Lancaster             | North West England | 111,741          | 23.57%             | 26,338                  | 0.26%           | 534                                  | 267      | 44    | 10   | 1   |
|                        | Pendle                | North West England | 69,061           | 23.18%             | 16,006                  | 0.16%           | 324                                  | 162      | 27    | 6    | 0.9 |
|                        | Preston               | North West England | 109,907          | 24.82%             | 27,276                  | 0.27%           | 553                                  | 276      | 46    | 11   | 2   |
|                        | Ribble Valley         | North West England | 45,227           | 14.70%             | 6,649                   | 0.07%           | 135                                  | 67       | 11    | 3    | 0.4 |
|                        | Rossendale            | North West England | 53,015           | 23.38%             | 12,397                  | 0.12%           | 251                                  | 126      | 21    | 5    | 0.7 |
|                        | South Ribble          | North West England | 86,537           | 18.02%             | 15,597                  | 0.15%           | 316                                  | 158      | 26    | 6    | 0.9 |
|                        | West Lancashire       | North West England | 87,923           | 28.17%             | 24,766                  | 0.24%           | 502                                  | 251      | 42    | 10   | 1   |
|                        | Wyre                  | North West England | 87,789           | 18.78%             | 16,484                  | 0.16%           | 334                                  | 167      | 28    | 6    | 0.9 |
| Medway                 |                       | South East England | 203,927          | 23.63%             | 48,186                  | 0.47%           | 976                                  | 488      | 81    | 19   | 3   |
| Bracknell Forest       |                       | South East England | 87,071           | 19.39%             | 16,886                  | 0.17%           | 342                                  | 171      | 29    | 7    | 0.9 |
| West Berkshire         |                       | South East England | 118,711          | 18.44%             | 21,888                  | 0.21%           | 444                                  | 222      | 37    | 9    | 1   |
| Reading                |                       | South East England | 121,930          | 18.84%             | 22,972                  | 0.22%           | 466                                  | 233      | 39    | 9    | 1   |
| Slough                 |                       | South East England | 103,297          | 23.85%             | 24,639                  | 0.24%           | 499                                  | 250      | 42    | 10   | 1   |
| Windsor and Maidenhead |                       | South East England | 112,520          | 14.83%             | 16,692                  | 0.16%           | 338                                  | 169      | 28    | 7    | 0.9 |
| Wokingham              |                       | South East England | 119,367          | 13.78%             | 16,452                  | 0.16%           | 333                                  | 167      | 28    | 6    | 0.9 |
| Milton Keynes          |                       | South East England | 187,923          | 18.02%             | 33,863                  | 0.33%           | 686                                  | 343      | 57    | 13   | 2   |
| Brighton and Hove      |                       | South East England | 223,063          | 22.85%             | 50,977                  | 0.50%           | 1,033                                | 517      | 86    | 20   | 3   |
| Portsmouth             |                       | South East England | 162,967          | 22.93%             | 37,373                  | 0.37%           | 757                                  | 379      | 63    | 15   | 2   |
| Southampton            |                       | South East England | 189,638          | 22.64%             | 42,940                  | 0.42%           | 870                                  | 435      | 73    | 17   | 2   |
| Isle of Wight          |                       | South East England | 112,246          | 20.44%             | 22,944                  | 0.22%           | 465                                  | 232      | 39    | 9    | 1   |
| Buckinghamshire        |                       | South East England | 391,045          | 15.38%             | 60,146                  | 0.59%           | 1,219                                | 609      | 102   | 23   | 3   |
|                        | Aylesbury Vale        | South East England | 134,514          | 15.20%             | 20,443                  | 0.20%           | 414                                  | 207      | 35    | 8    | 1   |
|                        | Chiltern              | South East England | 71,231           | 12.99%             | 9,254                   | 0.09%           | 188                                  | 94       | 16    | 4    | 0.5 |
|                        | South Bucks           | South East England | 52,642           | 13.42%             | 7,067                   | 0.07%           | 143                                  | 72       | 12    | 3    | 0.4 |
|                        | Wycombe               | South East England | 132,658          | 17.72%             | 23,502                  | 0.23%           | 476                                  | 238      | 40    | 9    | 1   |
| East Sussex            |                       | South East England | 422,924          | 19.84%             | 83,925                  | 0.82%           | 1,701                                | 850      | 142   | 33   | 5   |
|                        | Eastbourne            | South East England | 80,172           | 21.19%             | 16,989                  | 0.17%           | 344                                  | 172      | 29    | 7    | 0.9 |
|                        | Hastings              | South East England | 71,156           | 27.04%             | 19,240                  | 0.19%           | 390                                  | 195      | 32    | 7    | 1   |
|                        | Lewes                 | South East England | 78,325           | 20.05%             | 15,701                  | 0.15%           | 318                                  | 159      | 27    | 6    | 0.9 |
|                        | Rother                | South East England | 74,239           | 14.06%             | 10,436                  | 0.10%           | 211                                  | 106      | 18    | 4    | 0.6 |
|                        | Wealden               | South East England | 119,032          | 18.20%             | 21,665                  | 0.21%           | 439                                  | 220      | 37    | 8    | 1   |
| Hampshire              |                       | South East England | 1,041,967        | 17.52%             | 182,558                 | 1.79%           | 3,700                                | 1,850    | 308   | 71   | 10  |
|                        | Basingstoke and Deane | South East England | 130,468          | 20.24%             | 26,412                  | 0.26%           | 535                                  | 268      | 45    | 10   | 1   |
|                        | East Hampshire        | South East England | 91,278           | 15.35%             | 14,009                  | 0.14%           | 284                                  | 142      | 24    | 5    | 0.8 |
|                        | Eastleigh             | South East England | 98,794           | 14.62%             | 14,440                  | 0.14%           | 293                                  | 146      | 24    | 6    | 0.8 |

| Authority   | District              | Region             | Adult population | Smoking prevalence | Number of adult smokers | % of UK smokers | Number of new childhood smokers per: |          |       |      |     |
|-------------|-----------------------|--------------------|------------------|--------------------|-------------------------|-----------------|--------------------------------------|----------|-------|------|-----|
|             |                       |                    |                  |                    |                         |                 | Year                                 | 6 months | Month | Week | Day |
|             | Fareham               | South East England | 89,657           | 17.78%             | 15,941                  | 0.16%           | 323                                  | 162      | 27    | 6    | 0.9 |
|             | Gosport               | South East England | 64,450           | 20.37%             | 13,128                  | 0.13%           | 266                                  | 133      | 22    | 5    | 0.7 |
|             | Hart                  | South East England | 70,936           | 14.53%             | 10,310                  | 0.10%           | 209                                  | 104      | 17    | 4    | 0.6 |
|             | Havant                | South East England | 95,818           | 21.72%             | 20,816                  | 0.20%           | 422                                  | 211      | 35    | 8    | 1   |
|             | New Forest            | South East England | 143,879          | 16.78%             | 24,143                  | 0.24%           | 489                                  | 245      | 41    | 9    | 1   |
|             | Rushmoor              | South East England | 72,883           | 24.27%             | 17,690                  | 0.17%           | 358                                  | 179      | 30    | 7    | 1   |
|             | Test Valley           | South East England | 91,747           | 13.62%             | 12,496                  | 0.12%           | 253                                  | 127      | 21    | 5    | 0.7 |
|             | Winchester            | South East England | 92,057           | 13.99%             | 12,877                  | 0.13%           | 261                                  | 130      | 22    | 5    | 0.7 |
| Kent        |                       | South East England | 1,143,723        | 20.11%             | 229,956                 | 2.25%           | 4,660                                | 2,330    | 388   | 90   | 13  |
|             | Ashford               | South East England | 90,702           | 18.28%             | 16,580                  | 0.16%           | 336                                  | 168      | 28    | 6    | 0.9 |
|             | Canterbury            | South East England | 121,751          | 23.41%             | 28,501                  | 0.28%           | 578                                  | 289      | 48    | 11   | 2   |
|             | Dartford              | South East England | 75,078           | 16.70%             | 12,540                  | 0.12%           | 254                                  | 127      | 21    | 5    | 0.7 |
|             | Dover                 | South East England | 88,558           | 27.43%             | 24,292                  | 0.24%           | 492                                  | 246      | 41    | 9    | 1   |
|             | Gravesham             | South East England | 78,143           | 23.17%             | 18,102                  | 0.18%           | 367                                  | 183      | 31    | 7    | 1   |
|             | Maidstone             | South East England | 121,996          | 18.70%             | 22,807                  | 0.22%           | 462                                  | 231      | 39    | 9    | 1   |
|             | Sevenoaks             | South East England | 89,774           | 16.41%             | 14,732                  | 0.14%           | 299                                  | 149      | 25    | 6    | 0.8 |
|             | Shepway               | South East England | 86,274           | 20.95%             | 18,073                  | 0.18%           | 366                                  | 183      | 31    | 7    | 1   |
|             | Swale                 | South East England | 105,332          | 20.52%             | 21,611                  | 0.21%           | 438                                  | 219      | 36    | 8    | 1   |
|             | Thanet                | South East England | 105,245          | 21.65%             | 22,786                  | 0.22%           | 462                                  | 231      | 38    | 9    | 1   |
|             | Tonbridge and Malling | South East England | 92,485           | 13.68%             | 12,653                  | 0.12%           | 256                                  | 128      | 21    | 5    | 0.7 |
|             | Tunbridge Wells       | South East England | 88,385           | 20.43%             | 18,055                  | 0.18%           | 366                                  | 183      | 30    | 7    | 1   |
| Oxfordshire |                       | South East England | 516,775          | 17.54%             | 90,645                  | 0.89%           | 1,837                                | 918      | 153   | 35   | 5   |
|             | Cherwell              | South East England | 110,286          | 20.20%             | 22,274                  | 0.22%           | 451                                  | 226      | 38    | 9    | 1   |
|             | Oxford                | South East England | 122,032          | 22.08%             | 26,941                  | 0.26%           | 546                                  | 273      | 45    | 10   | 1   |
|             | South Oxfordshire     | South East England | 105,580          | 15.63%             | 16,503                  | 0.16%           | 334                                  | 167      | 28    | 6    | 0.9 |
|             | Vale of White Horse   | South East England | 95,541           | 12.68%             | 12,110                  | 0.12%           | 245                                  | 123      | 20    | 5    | 0.7 |
|             | West Oxfordshire      | South East England | 83,336           | 15.30%             | 12,754                  | 0.12%           | 258                                  | 129      | 22    | 5    | 0.7 |
| Surrey      |                       | South East England | 888,398          | 15.81%             | 140,493                 | 1.38%           | 2,847                                | 1,424    | 237   | 55   | 8   |
|             | Elmbridge             | South East England | 100,140          | 19.76%             | 19,791                  | 0.19%           | 401                                  | 201      | 33    | 8    | 1   |
|             | Epsom and Ewell       | South East England | 58,485           | 12.08%             | 7,068                   | 0.07%           | 143                                  | 72       | 12    | 3    | 0.4 |
|             | Guildford             | South East England | 109,916          | 16.36%             | 17,979                  | 0.18%           | 364                                  | 182      | 30    | 7    | 1   |
|             | Mole Valley           | South East England | 67,541           | 13.82%             | 9,331                   | 0.09%           | 189                                  | 95       | 16    | 4    | 0.5 |
|             | Reigate and Banstead  | South East England | 107,835          | 15.72%             | 16,950                  | 0.17%           | 344                                  | 172      | 29    | 7    | 0.9 |
|             | Runnymede             | South East England | 64,876           | 11.64%             | 7,555                   | 0.07%           | 153                                  | 77       | 13    | 3    | 0.4 |
|             | Spelthorne            | South East England | 76,045           | 18.68%             | 14,207                  | 0.14%           | 288                                  | 144      | 24    | 6    | 0.8 |

| Authority                    | District         | Region             | Adult population | Smoking prevalence | Number of adult smokers | % of UK smokers | Number of new childhood smokers per: |          |       |      |     |
|------------------------------|------------------|--------------------|------------------|--------------------|-------------------------|-----------------|--------------------------------------|----------|-------|------|-----|
|                              |                  |                    |                  |                    |                         |                 | Year                                 | 6 months | Month | Week | Day |
|                              | Surrey Heath     | South East England | 67,278           | 11.86%             | 7,978                   | 0.08%           | 162                                  | 81       | 13    | 3    | 0.4 |
|                              | Tandridge        | South East England | 64,872           | 15.99%             | 10,374                  | 0.10%           | 210                                  | 105      | 18    | 4    | 0.6 |
|                              | Waverley         | South East England | 94,212           | 17.17%             | 16,179                  | 0.16%           | 328                                  | 164      | 27    | 6    | 0.9 |
|                              | Woking (borough) | South East England | 77,198           | 17.21%             | 13,286                  | 0.13%           | 269                                  | 135      | 22    | 5    | 0.7 |
| West Sussex                  |                  | South East England | 644,494          | 18.50%             | 119,217                 | 1.17%           | 2,416                                | 1,208    | 201   | 46   | 7   |
|                              | Adur             | South East England | 49,202           | 16.86%             | 8,294                   | 0.08%           | 168                                  | 84       | 14    | 3    | 0.5 |
|                              | Arun             | South East England | 123,193          | 12.18%             | 15,009                  | 0.15%           | 304                                  | 152      | 25    | 6    | 0.8 |
|                              | Chichester       | South East England | 92,980           | 20.99%             | 19,513                  | 0.19%           | 395                                  | 198      | 33    | 8    | 1   |
|                              | Crawley          | South East England | 82,219           | 21.25%             | 17,471                  | 0.17%           | 354                                  | 177      | 30    | 7    | 1   |
|                              | Horsham          | South East England | 103,494          | 14.72%             | 15,232                  | 0.15%           | 309                                  | 154      | 26    | 6    | 0.8 |
|                              | Mid Sussex       | South East England | 109,390          | 24.23%             | 26,508                  | 0.26%           | 537                                  | 269      | 45    | 10   | 1   |
|                              | Worthing         | South East England | 84,016           | 20.46%             | 17,189                  | 0.17%           | 348                                  | 174      | 29    | 7    | 1   |
| Bath and North East Somerset |                  | South West England | 141,884          | 16.43%             | 23,308                  | 0.23%           | 472                                  | 236      | 39    | 9    | 1   |
| Bristol                      |                  | South West England | 340,426          | 20.95%             | 71,336                  | 0.70%           | 1,446                                | 723      | 120   | 28   | 4   |
| North Somerset               |                  | South West England | 161,585          | 16.34%             | 26,401                  | 0.26%           | 535                                  | 268      | 45    | 10   | 1   |
| South Gloucestershire        |                  | South West England | 206,430          | 16.52%             | 34,092                  | 0.33%           | 691                                  | 345      | 58    | 13   | 2   |
| Cornwall                     |                  | South West England | 443,785          | 21.39%             | 94,926                  | 0.93%           | 1,924                                | 962      | 160   | 37   | 5   |
| Plymouth                     |                  | South West England | 205,699          | 22.14%             | 45,538                  | 0.45%           | 923                                  | 461      | 77    | 18   | 3   |
| Torbay                       |                  | South West England | 106,363          | 21.32%             | 22,674                  | 0.22%           | 460                                  | 230      | 38    | 9    | 1   |
| Bournemouth                  |                  | South West England | 151,630          | 19.01%             | 28,824                  | 0.28%           | 584                                  | 292      | 49    | 11   | 2   |
| Poole                        |                  | South West England | 118,866          | 18.26%             | 21,704                  | 0.21%           | 440                                  | 220      | 37    | 8    | 1   |
| Swindon                      |                  | South West England | 163,136          | 21.15%             | 34,505                  | 0.34%           | 699                                  | 350      | 58    | 13   | 2   |
| Wiltshire                    |                  | South West England | 370,735          | 17.15%             | 63,581                  | 0.62%           | 1,288                                | 644      | 107   | 25   | 4   |
| Devon                        |                  | South West England | 607,156          | 20.21%             | 122,724                 | 1.20%           | 2,487                                | 1,244    | 207   | 48   | 7   |
|                              | East Devon       | South West England | 109,685          | 19.06%             | 20,904                  | 0.20%           | 424                                  | 212      | 35    | 8    | 1   |
|                              | Exeter           | South West England | 96,145           | 18.68%             | 17,962                  | 0.18%           | 364                                  | 182      | 30    | 7    | 1   |
|                              | Mid Devon        | South West England | 61,385           | 21.08%             | 12,937                  | 0.13%           | 262                                  | 131      | 22    | 5    | 0.7 |
|                              | North Devon      | South West England | 75,415           | 22.36%             | 16,863                  | 0.17%           | 342                                  | 171      | 28    | 7    | 0.9 |
|                              | South Hams       | South West England | 68,277           | 20.77%             | 14,178                  | 0.14%           | 287                                  | 144      | 24    | 6    | 0.8 |
|                              | Teignbridge      | South West England | 100,850          | 22.72%             | 22,913                  | 0.22%           | 464                                  | 232      | 39    | 9    | 1   |
|                              | Torridge         | South West England | 51,901           | 20.05%             | 10,408                  | 0.10%           | 211                                  | 105      | 18    | 4    | 0.6 |
|                              | West Devon       | South West England | 43,498           | 14.72%             | 6,403                   | 0.06%           | 130                                  | 65       | 11    | 2    | 0.4 |
| Dorset                       |                  | South West England | 336,283          | 17.12%             | 57,562                  | 0.56%           | 1,167                                | 583      | 97    | 22   | 3   |
|                              | Christchurch     | South West England | 39,368           | 16.18%             | 6,368                   | 0.06%           | 129                                  | 65       | 11    | 2    | 0.4 |
|                              | East Dorset      | South West England | 71,714           | 13.27%             | 9,517                   | 0.09%           | 193                                  | 96       | 16    | 4    | 0.5 |



| Authority          | District              | Region             | Adult population | Smoking prevalence | Number of adult smokers | % of UK smokers | Number of new childhood smokers per: |          |       |      |     |
|--------------------|-----------------------|--------------------|------------------|--------------------|-------------------------|-----------------|--------------------------------------|----------|-------|------|-----|
|                    |                       |                    |                  |                    |                         |                 | Year                                 | 6 months | Month | Week | Day |
|                    | North Dorset          | South West England | 54,670           | 21.05%             | 11,510                  | 0.11%           | 233                                  | 117      | 19    | 4    | 0.6 |
|                    | Purbeck               | South West England | 36,794           | 17.22%             | 6,337                   | 0.06%           | 128                                  | 64       | 11    | 2    | 0.4 |
|                    | West Dorset           | South West England | 80,957           | 14.67%             | 11,877                  | 0.12%           | 241                                  | 120      | 20    | 5    | 0.7 |
|                    | Weymouth and Portland | South West England | 52,780           | 23.92%             | 12,627                  | 0.12%           | 256                                  | 128      | 21    | 5    | 0.7 |
| Gloucestershire    |                       | South West England | 476,120          | 18.48%             | 87,988                  | 0.86%           | 1,783                                | 892      | 149   | 34   | 5   |
|                    | Cheltenham            | South West England | 93,124           | 17.94%             | 16,709                  | 0.16%           | 339                                  | 169      | 28    | 7    | 0.9 |
|                    | Cotswold              | South West England | 67,425           | 13.57%             | 9,151                   | 0.09%           | 185                                  | 93       | 15    | 4    | 0.5 |
|                    | Forest of Dean        | South West England | 65,869           | 19.74%             | 13,006                  | 0.13%           | 264                                  | 132      | 22    | 5    | 0.7 |
|                    | Gloucester            | South West England | 94,502           | 25.14%             | 23,762                  | 0.23%           | 482                                  | 241      | 40    | 9    | 1   |
|                    | Stroud                | South West England | 89,503           | 20.69%             | 18,519                  | 0.18%           | 375                                  | 188      | 31    | 7    | 1   |
|                    | Tewkesbury            | South West England | 65,697           | 10.28%             | 6,756                   | 0.07%           | 137                                  | 68       | 11    | 3    | 0.4 |
| Somerset           |                       | South West England | 422,799          | 19.15%             | 80,983                  | 0.79%           | 1,641                                | 821      | 137   | 32   | 4   |
|                    | Mendip                | South West England | 85,687           | 17.58%             | 15,061                  | 0.15%           | 305                                  | 153      | 25    | 6    | 0.8 |
|                    | Sedgemoor             | South West England | 91,210           | 18.39%             | 16,774                  | 0.16%           | 340                                  | 170      | 28    | 7    | 0.9 |
|                    | South Somerset        | South West England | 129,408          | 23.06%             | 29,839                  | 0.29%           | 605                                  | 302      | 50    | 12   | 2   |
|                    | Taunton Deane         | South West England | 87,455           | 16.20%             | 14,165                  | 0.14%           | 287                                  | 144      | 24    | 6    | 0.8 |
|                    | West Somerset         | South West England | 29,039           | 17.31%             | 5,025                   | 0.05%           | 102                                  | 51       | 8     | 2    | 0.3 |
| Birmingham         |                       | West Midlands      | 799,835          | 19.31%             | 154,426                 | 1.51%           | 3,129                                | 1,565    | 261   | 60   | 9   |
| Coventry           |                       | West Midlands      | 246,354          | 18.18%             | 44,777                  | 0.44%           | 907                                  | 454      | 76    | 17   | 2   |
| Dudley             |                       | West Midlands      | 245,581          | 19.08%             | 46,869                  | 0.46%           | 950                                  | 475      | 79    | 18   | 3   |
| Sandwell           |                       | West Midlands      | 234,401          | 22.88%             | 53,627                  | 0.53%           | 1,087                                | 543      | 91    | 21   | 3   |
| Solihull           |                       | West Midlands      | 161,899          | 13.25%             | 21,448                  | 0.21%           | 435                                  | 217      | 36    | 8    | 1   |
| Walsall            |                       | West Midlands      | 206,203          | 22.72%             | 46,850                  | 0.46%           | 949                                  | 475      | 79    | 18   | 3   |
| Wolverhampton      |                       | West Midlands      | 193,687          | 22.16%             | 42,918                  | 0.42%           | 870                                  | 435      | 72    | 17   | 2   |
| Herefordshire      |                       | West Midlands      | 147,755          | 17.42%             | 25,736                  | 0.25%           | 522                                  | 261      | 43    | 10   | 1   |
| Telford and Wrekin |                       | West Midlands      | 127,921          | 22.38%             | 28,630                  | 0.28%           | 580                                  | 290      | 48    | 11   | 2   |
| Shropshire         |                       | West Midlands      | 246,004          | 17.38%             | 42,746                  | 0.42%           | 866                                  | 433      | 72    | 17   | 2   |
| Stoke-on-Trent     |                       | West Midlands      | 194,183          | 25.34%             | 49,216                  | 0.48%           | 997                                  | 499      | 83    | 19   | 3   |
| Staffordshire      |                       | West Midlands      | 678,241          | 19.13%             | 129,760                 | 1.27%           | 2,630                                | 1,315    | 219   | 51   | 7   |
|                    | Cannock Chase         | West Midlands      | 76,657           | 19.61%             | 15,030                  | 0.15%           | 305                                  | 152      | 25    | 6    | 0.8 |
|                    | East Staffordshire    | West Midlands      | 89,046           | 20.03%             | 17,832                  | 0.17%           | 361                                  | 181      | 30    | 7    | 1   |
|                    | Lichfield             | West Midlands      | 80,816           | 17.31%             | 13,988                  | 0.14%           | 283                                  | 142      | 24    | 5    | 0.8 |
|                    | Newcastle-under-Lyme  | West Midlands      | 99,846           | 20.05%             | 20,018                  | 0.20%           | 406                                  | 203      | 34    | 8    | 1   |
|                    | South Staffordshire   | West Midlands      | 87,899           | 15.43%             | 13,562                  | 0.13%           | 275                                  | 137      | 23    | 5    | 0.8 |
|                    | Stafford              | West Midlands      | 105,607          | 21.05%             | 22,230                  | 0.22%           | 451                                  | 225      | 38    | 9    | 1   |

| Authority                | District                | Region                   | Adult population | Smoking prevalence | Number of adult smokers | % of UK smokers | Number of new childhood smokers per: |          |       |      |     |
|--------------------------|-------------------------|--------------------------|------------------|--------------------|-------------------------|-----------------|--------------------------------------|----------|-------|------|-----|
|                          |                         |                          |                  |                    |                         |                 | Year                                 | 6 months | Month | Week | Day |
|                          | Staffordshire Moorlands | West Midlands            | 78,814           | 18.85%             | 14,855                  | 0.15%           | 301                                  | 151      | 25    | 6    | 0.8 |
|                          | Tamworth                | West Midlands            | 59,556           | 20.17%             | 12,015                  | 0.12%           | 243                                  | 122      | 20    | 5    | 0.7 |
| Warwickshire             |                         | West Midlands            | 434,734          | 19.07%             | 82,894                  | 0.81%           | 1,680                                | 840      | 140   | 32   | 5   |
|                          | North Warwickshire      | West Midlands            | 49,576           | 12.81%             | 6,348                   | 0.06%           | 129                                  | 64       | 11    | 2    | 0.4 |
|                          | Nuneaton and Bedworth   | West Midlands            | 98,109           | 22.95%             | 22,515                  | 0.22%           | 456                                  | 228      | 38    | 9    | 1   |
|                          | Rugby                   | West Midlands            | 78,408           | 14.61%             | 11,458                  | 0.11%           | 232                                  | 116      | 19    | 4    | 0.6 |
|                          | Stratford-on-Avon       | West Midlands            | 97,462           | 20.19%             | 19,681                  | 0.19%           | 399                                  | 199      | 33    | 8    | 1   |
|                          | Warwick                 | West Midlands            | 111,179          | 20.51%             | 22,803                  | 0.22%           | 462                                  | 231      | 39    | 9    | 1   |
| Worcestershire           |                         | West Midlands            | 451,905          | 18.43%             | 83,276                  | 0.82%           | 1,688                                | 844      | 141   | 32   | 5   |
|                          | Bromsgrove              | West Midlands            | 74,778           | 15.75%             | 11,777                  | 0.12%           | 239                                  | 119      | 20    | 5    | 0.7 |
|                          | Malvern Hills           | West Midlands            | 60,223           | 15.15%             | 9,125                   | 0.09%           | 185                                  | 92       | 15    | 4    | 0.5 |
|                          | Redditch                | West Midlands            | 65,570           | 25.24%             | 16,550                  | 0.16%           | 335                                  | 168      | 28    | 6    | 0.9 |
|                          | Worcester               | West Midlands            | 77,900           | 23.01%             | 17,924                  | 0.18%           | 363                                  | 182      | 30    | 7    | 1   |
|                          | Wychavon                | West Midlands            | 94,369           | 16.93%             | 15,974                  | 0.16%           | 324                                  | 162      | 27    | 6    | 0.9 |
|                          | Wyre Forest             | West Midlands            | 79,065           | 15.45%             | 12,218                  | 0.12%           | 248                                  | 124      | 21    | 5    | 0.7 |
| Barnsley                 |                         | Yorkshire and the Humber | 183,087          | 25.63%             | 46,916                  | 0.46%           | 951                                  | 475      | 79    | 18   | 3   |
| Doncaster                |                         | Yorkshire and the Humber | 237,259          | 26.98%             | 64,009                  | 0.63%           | 1,297                                | 649      | 108   | 25   | 4   |
| Rotherham                |                         | Yorkshire and the Humber | 201,646          | 23.31%             | 46,994                  | 0.46%           | 952                                  | 476      | 79    | 18   | 3   |
| Sheffield                |                         | Yorkshire and the Humber | 438,565          | 21.57%             | 94,598                  | 0.93%           | 1,917                                | 959      | 160   | 37   | 5   |
| Bradford                 |                         | Yorkshire and the Humber | 386,554          | 21.45%             | 82,923                  | 0.81%           | 1,680                                | 840      | 140   | 32   | 5   |
| Calderdale               |                         | Yorkshire and the Humber | 158,856          | 22.00%             | 34,953                  | 0.34%           | 708                                  | 354      | 59    | 14   | 2   |
| Kirklees                 |                         | Yorkshire and the Humber | 326,107          | 23.58%             | 76,902                  | 0.75%           | 1,558                                | 779      | 130   | 30   | 4   |
| Leeds                    |                         | Yorkshire and the Humber | 595,800          | 23.05%             | 137,312                 | 1.34%           | 2,783                                | 1,391    | 232   | 54   | 8   |
| Wakefield                |                         | Yorkshire and the Humber | 258,024          | 23.02%             | 59,401                  | 0.58%           | 1,204                                | 602      | 100   | 23   | 3   |
| Kingston upon Hull       |                         | Yorkshire and the Humber | 201,406          | 29.32%             | 59,046                  | 0.58%           | 1,197                                | 598      | 100   | 23   | 3   |
| East Riding of Yorkshire |                         | Yorkshire and the Humber | 270,707          | 17.21%             | 46,580                  | 0.46%           | 944                                  | 472      | 79    | 18   | 3   |
| North East Lincolnshire  |                         | Yorkshire and the Humber | 125,389          | 27.35%             | 34,292                  | 0.34%           | 695                                  | 347      | 58    | 13   | 2   |
| North Lincolnshire       |                         | Yorkshire and the Humber | 132,044          | 22.87%             | 30,192                  | 0.30%           | 612                                  | 306      | 51    | 12   | 2   |
| York                     |                         | Yorkshire and the Humber | 161,843          | 17.12%             | 27,702                  | 0.27%           | 561                                  | 281      | 47    | 11   | 2   |
| North Yorkshire          |                         | Yorkshire and the Humber | 482,504          | 16.71%             | 80,638                  | 0.79%           | 1,634                                | 817      | 136   | 31   | 4   |
|                          | Craven                  | Yorkshire and the Humber | 44,815           | 8.20%              | 3,675                   | 0.04%           | 74                                   | 37       | 6     | 1    | 0.2 |
|                          | Hambleton               | Yorkshire and the Humber | 72,375           | 16.04%             | 11,607                  | 0.11%           | 235                                  | 118      | 20    | 5    | 0.6 |
|                          | Harrogate               | Yorkshire and the Humber | 125,513          | 14.50%             | 18,203                  | 0.18%           | 369                                  | 184      | 31    | 7    | 1   |
|                          | Richmondshire           | Yorkshire and the Humber | 42,877           | 20.35%             | 8,725                   | 0.09%           | 177                                  | 88       | 15    | 3    | 0.5 |
|                          | Ryedale                 | Yorkshire and the Humber | 41,940           | 23.68%             | 9,930                   | 0.10%           | 201                                  | 101      | 17    | 4    | 0.6 |

| Authority             | District    | Region                   | Adult population | Smoking prevalence | Number of adult smokers | % of UK smokers | Number of new childhood smokers per: |          |       |      |     |
|-----------------------|-------------|--------------------------|------------------|--------------------|-------------------------|-----------------|--------------------------------------|----------|-------|------|-----|
|                       |             |                          |                  |                    |                         |                 | Year                                 | 6 months | Month | Week | Day |
|                       | Scarborough | Yorkshire and the Humber | 88,874           | 21.07%             | 18,723                  | 0.18%           | 379                                  | 190      | 32    | 7    | 1   |
|                       | Selby       | Yorkshire and the Humber | 66,110           | 14.96%             | 9,893                   | 0.10%           | 200                                  | 100      | 17    | 4    | 0.5 |
| Blaenau Gwent         |             | Wales                    | 55,476           | 27.75%             | 15,396                  | 0.15%           | 312                                  | 156      | 26    | 6    | 0.9 |
| Bridgend              |             | Wales                    | 110,509          | 22.53%             | 24,896                  | 0.24%           | 505                                  | 252      | 42    | 10   | 1   |
| Caerphilly            |             | Wales                    | 139,249          | 23.46%             | 32,668                  | 0.32%           | 662                                  | 331      | 55    | 13   | 2   |
| Cardiff               |             | Wales                    | 274,592          | 20.65%             | 56,694                  | 0.56%           | 1,149                                | 574      | 96    | 22   | 3   |
| Carmarthenshire       |             | Wales                    | 146,347          | 21.43%             | 31,364                  | 0.31%           | 636                                  | 318      | 53    | 12   | 2   |
| Ceredigion            |             | Wales                    | 62,523           | 21.94%             | 13,717                  | 0.13%           | 278                                  | 139      | 23    | 5    | 0.8 |
| Conwy                 |             | Wales                    | 93,382           | 22.31%             | 20,833                  | 0.20%           | 422                                  | 211      | 35    | 8    | 1   |
| Denbighshire          |             | Wales                    | 74,395           | 23.30%             | 17,336                  | 0.17%           | 351                                  | 176      | 29    | 7    | 1   |
| Flintshire            |             | Wales                    | 120,031          | 21.43%             | 25,726                  | 0.25%           | 521                                  | 261      | 43    | 10   | 1   |
| Gwynedd               |             | Wales                    | 97,845           | 20.95%             | 20,496                  | 0.20%           | 415                                  | 208      | 35    | 8    | 1   |
| Isle of Anglesey      |             | Wales                    | 56,398           | 24.94%             | 14,063                  | 0.14%           | 285                                  | 142      | 24    | 5    | 0.8 |
| Merthyr Tydfil        |             | Wales                    | 46,297           | 23.93%             | 11,077                  | 0.11%           | 224                                  | 112      | 19    | 4    | 0.6 |
| Monmouthshire         |             | Wales                    | 72,667           | 18.36%             | 13,341                  | 0.13%           | 270                                  | 135      | 23    | 5    | 0.7 |
| Neath Port Talbot     |             | Wales                    | 111,671          | 24.80%             | 27,699                  | 0.27%           | 561                                  | 281      | 47    | 11   | 2   |
| Newport               |             | Wales                    | 112,550          | 23.56%             | 26,514                  | 0.26%           | 537                                  | 269      | 45    | 10   | 1   |
| Pembrokeshire         |             | Wales                    | 97,509           | 24.10%             | 23,501                  | 0.23%           | 476                                  | 238      | 40    | 9    | 1   |
| Powys                 |             | Wales                    | 106,868          | 21.04%             | 22,480                  | 0.22%           | 456                                  | 228      | 38    | 9    | 1   |
| Rhondda Cynon Taf     |             | Wales                    | 184,278          | 26.36%             | 48,569                  | 0.48%           | 984                                  | 492      | 82    | 19   | 3   |
| Swansea               |             | Wales                    | 191,909          | 22.80%             | 43,753                  | 0.43%           | 887                                  | 443      | 74    | 17   | 2   |
| The Vale of Glamorgan |             | Wales                    | 99,443           | 21.37%             | 21,248                  | 0.21%           | 431                                  | 215      | 36    | 8    | 1   |
| Torfaen               |             | Wales                    | 71,371           | 26.46%             | 18,882                  | 0.18%           | 383                                  | 191      | 32    | 7    | 1   |
| Wrexham               |             | Wales                    | 106,015          | 24.64%             | 26,119                  | 0.26%           | 529                                  | 265      | 44    | 10   | 1   |
